# Supplementary material for: Three Years of the Coronavirus Disease 2019 Pandemic in a European Region: A Population-Based Longitudinal Assessment in Madrid Between 2020 and 2022
Source: Oxford University Press journal article supplement (doi:10.1093/ofid/ofad635), 2023-12-18
Supplement: ofad635_supplementary_data.pdf [file ofad635_supplementary_data.pdf]

**Table S1.** Characteristics of residents  $\geq 50$  years in the Madrid region on December 31, 2019

| Characteristic                | N=2531961         |
|-------------------------------|-------------------|
| Age, median (IQR), years      | 63.0 (56.0; 74.0) |
| Male sex, no. (%)             | 1,141,324 (45.1)  |
| <b>Comorbidities, no. (%)</b> |                   |
| Hypertension                  | 1,043,112 (41.2)  |
| Obesity                       | 375,352 (14.8)    |
| Diabetes                      | 383,442 (15.1)    |
| Depression                    | 343,844 (13.6)    |
| Chronic heart disease *       | 306,553 (12.1)    |
| Asthma                        | 144,143 (5.7)     |
| Solid Tumor                   | 125,538 (5.0)     |
| Cerebrovascular disease †     | 134,109 (5.3)     |
| COPD                          | 104,183 (4.1)     |
| Connective tissue disease ‡   | 88,436 (3.5)      |
| Dementia                      | 74,266 (2.9)      |
| Chronic Renal Failure         | 76,937 (3.0)      |
| Psychosis #                   | 22,293 (0.9)      |
| HIV infection                 | 12,464 (0.5)      |
| Hematologic Tumor             | 8,308 (0.3)       |
| Cirrhosis                     | 7,891 (0.3)       |
| Transplant                    | 2,049 (0.1)       |

\* Ischemic heart disease, Heart failure, Atrial fibrillation

† Stroke, Transient ischemic attack

‡ Rheumatoid arthritis, Ankylosing spondylitis, Systemic lupus erythematosus, other connective tissue disorders

# Affective psychosis, Schizophrenia, other organic psychoses

**Abbreviations:** COPD, chronic obstructive pulmonary disease; HIV, Human immunodeficiency virus

**Table S2.** Characteristics of hospitalizations with a COVID-19 ICD-10-CM code in the Madrid region, 2020-2022.

|                                                                          | 2020               |                    | 2021               |                    | 2022               |                    | 2020-2022          |
|--------------------------------------------------------------------------|--------------------|--------------------|--------------------|--------------------|--------------------|--------------------|--------------------|
|                                                                          | 1st semester       | 2nd semester       | 1st semester       | 2nd semester       | 1st semester       | 2nd semester       |                    |
| Alive at the beginning of the period)                                    | 6833522            | 6787716            | 6762325            | 6736679            | 6714698            | 6708682            | 6833522            |
| <b>All hospitalizations with a COVID-19 ICD-10-CM code, N (%)</b>        |                    |                    |                    |                    |                    |                    |                    |
| Number of hospitalizations                                               | 38896              | 27321              | 28854              | 12239              | 25452              | 6403               | 139165             |
| Hospitalizations per 100,000 persons                                     | 569.2              | 402.5              | 426.7              | 181.7              | 379.0              | 95.4               | 2036.5             |
| Age - years, median (IQR)                                                | 66.0 (53.0 - 79.0) | 64.0 (50.0 - 79.0) | 62.0 (50.0 - 75.0) | 62.0 (43.0 - 79.0) | 76.0 (61.0 - 85.0) | 76.0 (64.0 - 84.0) | 67.0 (52.0 - 80.0) |
| Male sex, N (%)                                                          | 21638 (55.6)       | 14895 (54.5)       | 16370 (56.7)       | 6546 (53.5)        | 12913 (50.7)       | 3213 (50.2)        | 75575 (54.3)       |
| Charlson score, median (IQR)                                             | 0.0 (0.0 - 2.0)    | 1.0 (0.0 - 2.0)    | 0.0 (0.0 - 2.0)    | 1.0 (0.0 - 2.0)    | 2.0 (0.0 - 4.0)    | 2.0 (1.0 - 4.0)    | 1.0 (0.0 - 2.0)    |
| Admission to ICU, N (%)                                                  | 2155 (5.5)         | 2375 (8.7)         | 2947 (10.2)        | 1364 (11.1)        | 1415 (5.6)         | 320 (5.0)          | 10576 (7.6)        |
| Admission to ICU, per 100,000 persons                                    | 31.5               | 35.0               | 43.6               | 20.2               | 21.1               | 4.8                | 154.8              |
| Mechanical ventilation, N (%)                                            | 2157 (5.5)         | 1689 (6.2)         | 2307 (8.0)         | 927 (7.6)          | 625 (2.5)          | 95 (1.5)           | 7800 (5.6)         |
| Mechanical ventilation, per 100,000 persons                              | 31.6               | 24.9               | 34.1               | 13.8               | 9.3                | 1.4                | 114.1              |
| Length of stay - days, median (IQR)                                      | 7.0 (4.0 - 14.0)   | 8.0 (5.0 - 14.0)   | 7.0 (5.0 - 13.0)   | 7.0 (4.0 - 14.0)   | 6.0 (3.0 - 12.0)   | 6.0 (4.0 - 12.0)   | 7.0 (4.0 - 13.0)   |
|                                                                          |                    |                    |                    |                    |                    |                    |                    |
| <b>COVID-19 present on admission coded as primary diagnosis, N (%)</b>   |                    |                    |                    |                    |                    |                    |                    |
| Number of hospitalizations                                               | 32347              | 20519              | 19035              | 6889               | 14428              | 3723               | 96941              |
| Hospitalizations per 100,000 persons                                     | 473.4              | 302.3              | 281.5              | 102.3              | 214.9              | 55.5               | 1418.6             |
| Age - years, median (IQR)                                                | 68.0 (55.0 - 79.0) | 65.0 (52.0 - 79.0) | 65.0 (53.0 - 76.0) | 67.0 (50.0 - 83.0) | 79.0 (68.0 - 86.0) | 79.0 (69.0 - 85.0) | 69.0 (55.0 - 81.0) |
| Male sex, N (%)                                                          | 18383 (56.8)       | 11578 (56.4)       | 11045 (58.0)       | 3800 (55.2)        | 7750 (53.7)        | 1983 (53.3)        | 54539 (56.3)       |
| Charlson score, median (IQR)                                             | 1.0 (0.0 - 2.0)    | 1.0 (0.0 - 2.0)    | 1.0 (0.0 - 2.0)    | 1.0 (0.0 - 3.0)    | 2.0 (1.0 - 4.0)    | 2.0 (1.0 - 4.0)    | 1.0 (0.0 - 2.0)    |
| Admission to ICU, N (%)                                                  | 1903 (5.9)         | 1883 (9.2)         | 2294 (12.1)        | 902 (13.1)         | 592 (4.1)          | 99 (2.7)           | 7673 (7.9)         |
| Admission to ICU, per 100,000 persons                                    | 27.8               | 27.7               | 33.9               | 13.4               | 8.8                | 1.5                | 112.3              |
| Mechanical ventilation, N (%)                                            | 2019 (6.2)         | 1384 (6.7)         | 1864 (9.8)         | 670 (9.7)          | 371 (2.6)          | 44 (1.2)           | 6352 (6.6)         |
| Mechanical ventilation, per 100,000 persons                              | 29.5               | 20.4               | 27.6               | 9.9                | 5.5                | 0.7                | 93.0               |
| Length of stay - days, median (IQR)                                      | 8.0 (4.0 - 14.0)   | 8.0 (5.0 - 13.0)   | 8.0 (5.0 - 13.0)   | 7.0 (4.0 - 13.0)   | 6.0 (3.0 - 10.0)   | 5.0 (3.0 - 9.0)    | 7.0 (4.0 - 13.0)   |
|                                                                          |                    |                    |                    |                    |                    |                    |                    |
| <b>COVID-19 present on admission coded as secondary diagnosis, N (%)</b> |                    |                    |                    |                    |                    |                    |                    |
| Number of hospitalizations                                               | 2468               | 2689               | 1752               | 1472               | 7651               | 1956               | 17988              |
| Hospitalizations per 100,000 persons                                     | 36.1               | 39.6               | 25.9               | 21.9               | 113.9              | 29.2               | 263.2              |
| Age - years, median (IQR)                                                | 74.0 (56.0 - 85.0) | 63.0 (36.0 - 80.0) | 63.0 (38.0 - 79.0) | 55.5 (32.0 - 77.0) | 69.0 (43.0 - 82.0) | 72.0 (54.0 - 82.0) | 68.0 (43.0 - 82.0) |
| Male sex, N (%)                                                          | 1136 (46.0)        | 1100 (40.9)        | 777 (44.3)         | 568 (38.6)         | 3343 (43.7)        | 890 (45.5)         | 7814 (43.4)        |
| Charlson score, median (IQR)                                             | 1.0 (0.0 - 3.0)    | 1.0 (0.0 - 3.0)    | 1.0 (0.0 - 3.0)    | 1.0 (0.0 - 3.0)    | 2.0 (0.0 - 4.0)    | 2.0 (0.0 - 4.0)    | 1.0 (0.0 - 3.0)    |
| Admission to ICU, N (%)                                                  | 160 (6.5)          | 169 (6.3)          | 113 (6.4)          | 129 (8.8)          | 544 (7.1)          | 148 (7.6)          | 1263 (7.0)         |
| Admission to ICU, per 100,000 persons                                    | 2.3                | 2.5                | 1.7                | 1.9                | 8.1                | 2.2                | 18.5               |
| Mechanical ventilation, N (%)                                            | 82 (3.3)           | 74 (2.8)           | 46 (2.6)           | 49 (3.3)           | 147 (1.9)          | 30 (1.5)           | 428 (2.4)          |
| Mechanical ventilation, per 100,000 persons                              | 1.2                | 1.1                | 0.7                | 0.7                | 2.2                | 0.4                | 6.3                |

|                                             |                    |                    |                    |                    |                    |                    |                    |
|---------------------------------------------|--------------------|--------------------|--------------------|--------------------|--------------------|--------------------|--------------------|
| Length of stay - days, median (IQR)         | 8.0 (4.0 - 16.0)   | 6.0 (3.0 - 14.0)   | 6.0 (3.0 - 13.0)   | 6.0 (3.0 - 13.0)   | 6.0 (3.0 - 11.0)   | 6.5 (3.0 - 12.0)   | 6.0 (3.0 - 13.0)   |
| <b>Hospital acquired COVID-19, N (%)</b>    |                    |                    |                    |                    |                    |                    |                    |
| Number of hospitalizations                  | 748                | 756                | 560                | 555                | 1082               | 340                | 4041               |
| Hospitalizations per 100,000 persons        | 10.9               | 11.1               | 8.3                | 8.2                | 16.1               | 5.1                | 59.1               |
| Age - years, median (IQR)                   | 58.0 (47.0 - 71.0) | 75.0 (62.0 - 83.0) | 72.0 (58.0 - 82.2) | 74.0 (61.0 - 84.0) | 75.0 (64.0 - 83.0) | 76.0 (66.0 - 83.0) | 72.0 (58.0 - 82.0) |
| Male sex, N (%)                             | 353 (47.2)         | 376 (49.7)         | 286 (51.1)         | 280 (50.5)         | 546 (50.5)         | 165 (48.5)         | 2006 (49.6)        |
| Charlson score, median (IQR)                | 0.0 (0.0 - 2.0)    | 2.0 (1.0 - 4.0)    | 2.0 (0.8 - 4.0)    | 2.0 (1.0 - 4.0)    | 2.5 (1.0 - 4.0)    | 2.0 (1.0 - 4.0)    | 2.0 (0.0 - 4.0)    |
| Admission to ICU, N (%)                     | 45 (6.0)           | 76 (10.1)          | 62 (11.1)          | 69 (12.4)          | 132 (12.2)         | 33 (9.7)           | 417 (10.3)         |
| Admission to ICU, per 100,000 persons       | 0.7                | 1.1                | 0.9                | 1.0                | 2.0                | 0.5                | 6.1                |
| Mechanical ventilation, N (%)               | 33 (4.4)           | 61 (8.1)           | 42 (7.5)           | 40 (7.2)           | 57 (5.3)           | 8 (2.4)            | 241 (6.0)          |
| Mechanical ventilation, per 100,000 persons | 0.5                | 0.9                | 0.6                | 0.6                | 0.8                | 0.1                | 3.5                |
| Length of stay - days, median (IQR)         | 10.0 (4.0 - 31.0)  | 37.0 (24.8 - 59.0) | 27.0 (15.0 - 44.2) | 35.0 (22.0 - 58.0) | 29.0 (19.2 - 46.0) | 28.0 (19.0 - 42.2) | 28.0 (16.0 - 48.0) |

**Table S3. COVID-19 vaccination status in the Madrid region, 2020-2022**

|                                                    | 2020                     |                          | 2021                     |                          | 2022                     |                          | 2020-2022           |
|----------------------------------------------------|--------------------------|--------------------------|--------------------------|--------------------------|--------------------------|--------------------------|---------------------|
|                                                    | 1 <sup>st</sup> semester | 2 <sup>nd</sup> semester | 1 <sup>st</sup> semester | 2 <sup>nd</sup> semester | 1 <sup>st</sup> semester | 2 <sup>nd</sup> semester |                     |
| <b>All the population</b>                          |                          |                          |                          |                          |                          |                          |                     |
| Persons alive at the beginning of the period       | 6,833,522                | 6,787,716                | 6,762,325                | 6,736,679                | 6,714,698                | 6,708,682                | 6,833,522           |
| Persons with 1 vaccine dose (%)                    | 15<br>(0.0)              | 3,276<br>(0.0)           | 3,071,164<br>(45.4)      | 5,064,533<br>(75.2)      | 5,221,943<br>(77.8)      | 5,223,937<br>(77.9)      | 5,256,973<br>(76.9) |
| Persons with 2 vaccine doses (%)                   | 6<br>(0.0)               | 125<br>(0.0)             | 2,032,090<br>(30.1)      | 4,467,932<br>(66.3)      | 4,883,822<br>(72.7)      | 4,908,204<br>(73.2)      | 4,937,661<br>(72.3) |
| Persons with 3 vaccine doses (%)                   | -                        | -                        | 554<br>(0.0)             | 1,401,046<br>(20.8)      | 2,689,284<br>(40.1)      | 2,873,553<br>(42.8)      | 2,881,326<br>(42.2) |
| <b>Individuals aged <math>\geq</math> 50 years</b> |                          |                          |                          |                          |                          |                          |                     |
| Persons alive at the beginning of the period       | 2,531,961                | 2,487,471                | 2,462,935                | 2,438,221                | 2,417,037                | 2,411,286                | 2,531,961           |
| Persons with 1 vaccine dose (%)                    | 10 (0.0)                 | 2,750 (0.1)              | 2,102,557<br>(85.4)      | 2,168,132<br>(88.9)      | 2,153,295<br>(89.1)      | 2,148,638<br>(89.1)      | 2,180,845<br>(86.1) |
| Persons with 2 vaccine doses (%)                   | 6 (0.0)                  | 60 (0.0)                 | 1,649,150<br>(67.0)      | 2,078,443<br>(85.2)      | 2,112,822<br>(87.4)      | 2,110,852<br>(87.5)      | 2,139,655<br>(84.5) |
| Persons with 3 vaccine doses (%)                   | -                        | -                        | 486<br>(0.0)             | 1,244,799<br>(51.1)      | 1,691,124<br>(70.0)      | 1,756,590<br>(72.8)      | 1,764,274<br>(69.7) |

**Table S4.** Thirty-day mortality after hospital admission for hospitalizations with COVID-19, Madrid region, 2020-2022

|                                                                       | 2020              |                  | 2021             |                 | 2022             |                 | 2020-2022          |
|-----------------------------------------------------------------------|-------------------|------------------|------------------|-----------------|------------------|-----------------|--------------------|
|                                                                       | 1st semester      | 2nd semester     | 1st semester     | 2nd semester    | 1st semester     | 2nd semester    |                    |
| <b>All COVID-19 hospitalizations</b>                                  |                   |                  |                  |                 |                  |                 |                    |
| All hospitalizations                                                  | 5059/38896 (13.0) | 2168/27321 (7.9) | 2260/28854 (7.8) | 927/12239 (7.6) | 1706/25452 (6.7) | 927/6403 (14.5) | 13047/139165 (9.4) |
| With ICU admission                                                    | 537/2155 (24.9)   | 316/2375 (13.3)  | 331/2947 (11.2)  | 149/1364 (10.9) | 160/1415 (11.3)  | 42/320 (13.1)   | 1535/10576 (14.5)  |
| With mech. ventilation                                                | 593/2157 (27.5)   | 287/1689 (17.0)  | 314/2307 (13.6)  | 123/927 (13.3)  | 117/625 (18.7)   | 26/95 (27.4)    | 1460/7800 (18.7)   |
| <b>COVID-19 present on admission and coded as primary diagnosis</b>   |                   |                  |                  |                 |                  |                 |                    |
| All hospitalizations                                                  | 4536/32347 (14.0) | 1791/20519 (8.7) | 1662/19035 (8.7) | 816/6889 (11.8) | 1429/14428 (9.9) | 224/3723 (6.0)  | 10458/96941 (10.8) |
| With ICU admission                                                    | 498/1903 (26.2)   | 232/1883 (12.3)  | 251/2294 (10.9)  | 110/902 (12.2)  | 94/592 (15.9)    | 19/99 (19.2)    | 1204/7673 (15.7)   |
| With mech. ventilation                                                | 561/2019 (27.8)   | 217/1384 (15.7)  | 244/1864 (13.1)  | 91/670 (13.6)   | 77/371 (20.8)    | 15/44 (34.1)    | 1205/6352 (19.0)   |
| <b>COVID-19 present on admission and coded as secondary diagnosis</b> |                   |                  |                  |                 |                  |                 |                    |
| All hospitalizations                                                  | 399/2468 (16.2)   | 208/2689 (7.7)   | 108/1752 (6.2)   | 90/1472 (6.1)   | 486/7651 (6.4)   | 91/1956 (4.7)   | 1382/17988 (7.7)   |
| With ICU admission                                                    | 26/160 (16.2)     | 26/169 (15.4)    | 13/113 (11.5)    | 14/129 (10.9)   | 51/544 (9.4)     | 13/148 (8.8)    | 143/1263 (11.3)    |
| With mech. ventilation                                                | 20/82 (24.4)      | 20/74 (27.0)     | 11/46 (23.9)     | 11/49 (22.4)    | 32/147 (21.8)    | 8/30 (26.7)     | 102/428 (23.8)     |
| <b>Hospital-associated COVID-19</b>                                   |                   |                  |                  |                 |                  |                 |                    |
| All hospitalizations                                                  | 78/748 (10.4)     | 158/756 (20.9)   | 95/560 (17.0)    | 75/555 (13.5)   | 81/1082 (7.5)    | 35/340 (10.3)   | 522/4041 (12.9)    |
| With ICU admission                                                    | 9/45 (20.0)       | 21/76 (27.6)     | 7/62 (11.3)      | 12/69 (17.4)    | 5/132 (3.8)      | 7/33 (21.2)     | 61/417 (14.6)      |
| With mech. ventilation                                                | 8/33 (24.2)       | 14/61 (23.0)     | 7/42 (16.7)      | 9/40 (22.5)     | 3/57 (5.3)       | 2/8 (25.0)      | 43/241 (17.8)      |

Columns show: Number of deaths within 30 days of hospitalization/Number of hospitalizations with COVID-19 (%)

Figure S1. Map from the region of Madrid (Comunidad Autónoma de Madrid) with its 179 municipalities. Highlighted in red is the metropolitan area of Madrid.

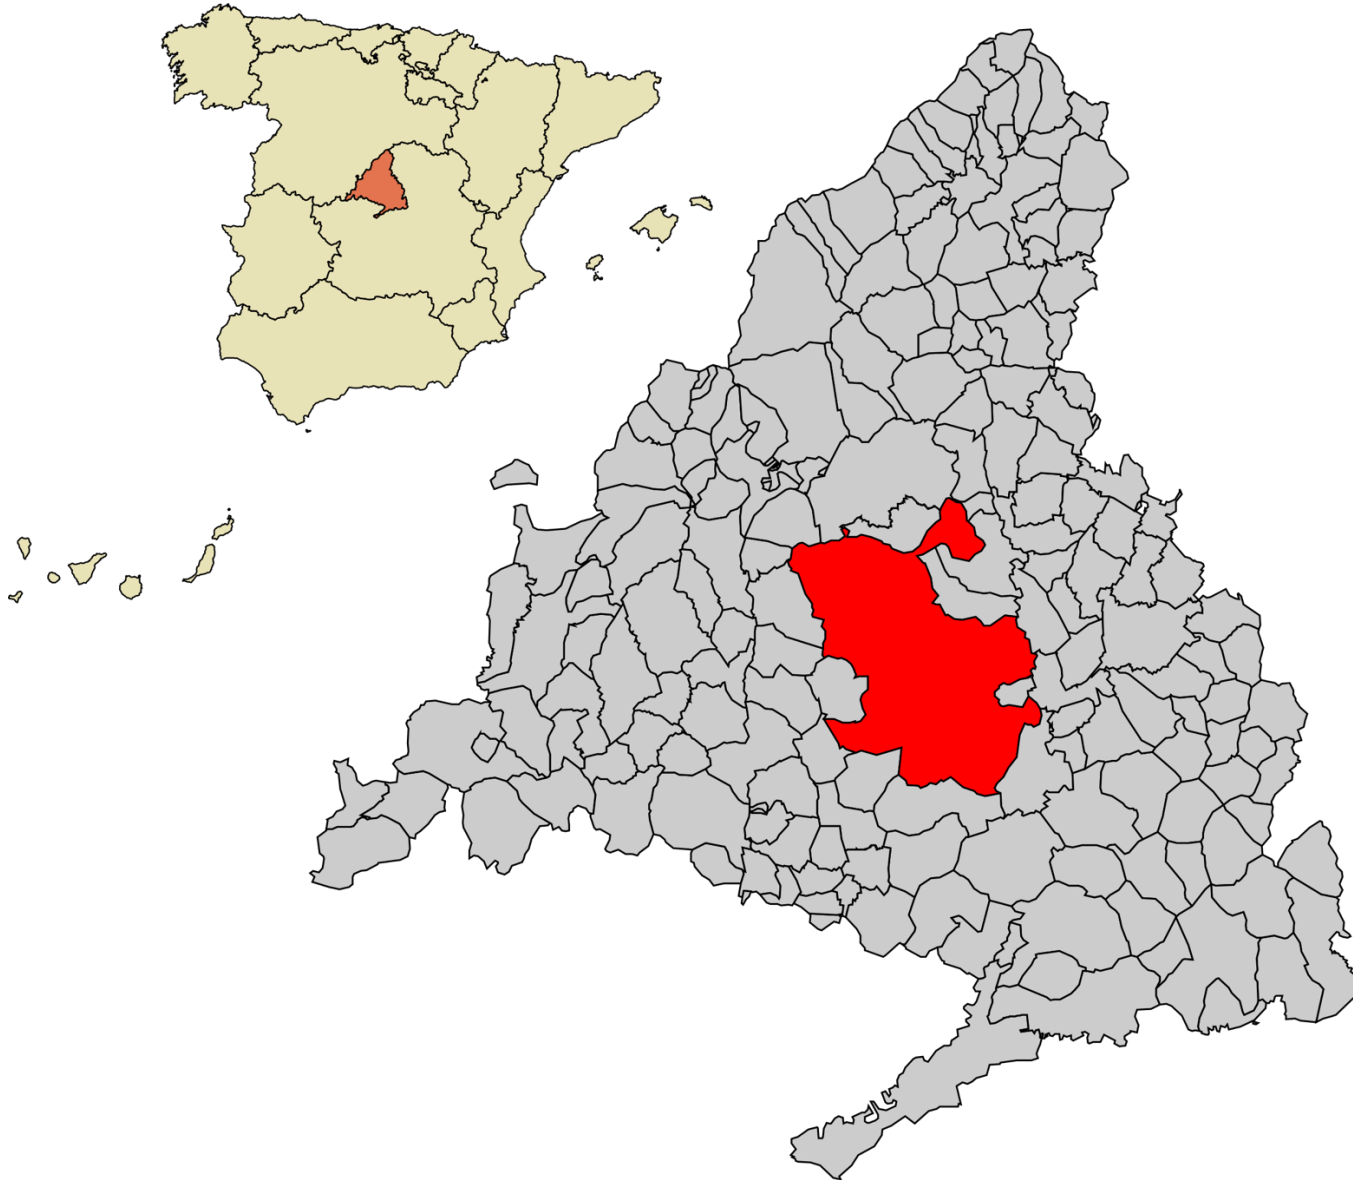

From Wikimedia Commons, the free media repository. [https://commons.wikimedia.org/wiki/File:Madrid\\_%28Comunidad\\_de\\_Madrid%29\\_mapa.svg](https://commons.wikimedia.org/wiki/File:Madrid_%28Comunidad_de_Madrid%29_mapa.svg)

Figure S2. Weekly distribution of SARS-CoV-2 variants of concern in the Madrid region, 2021-2022

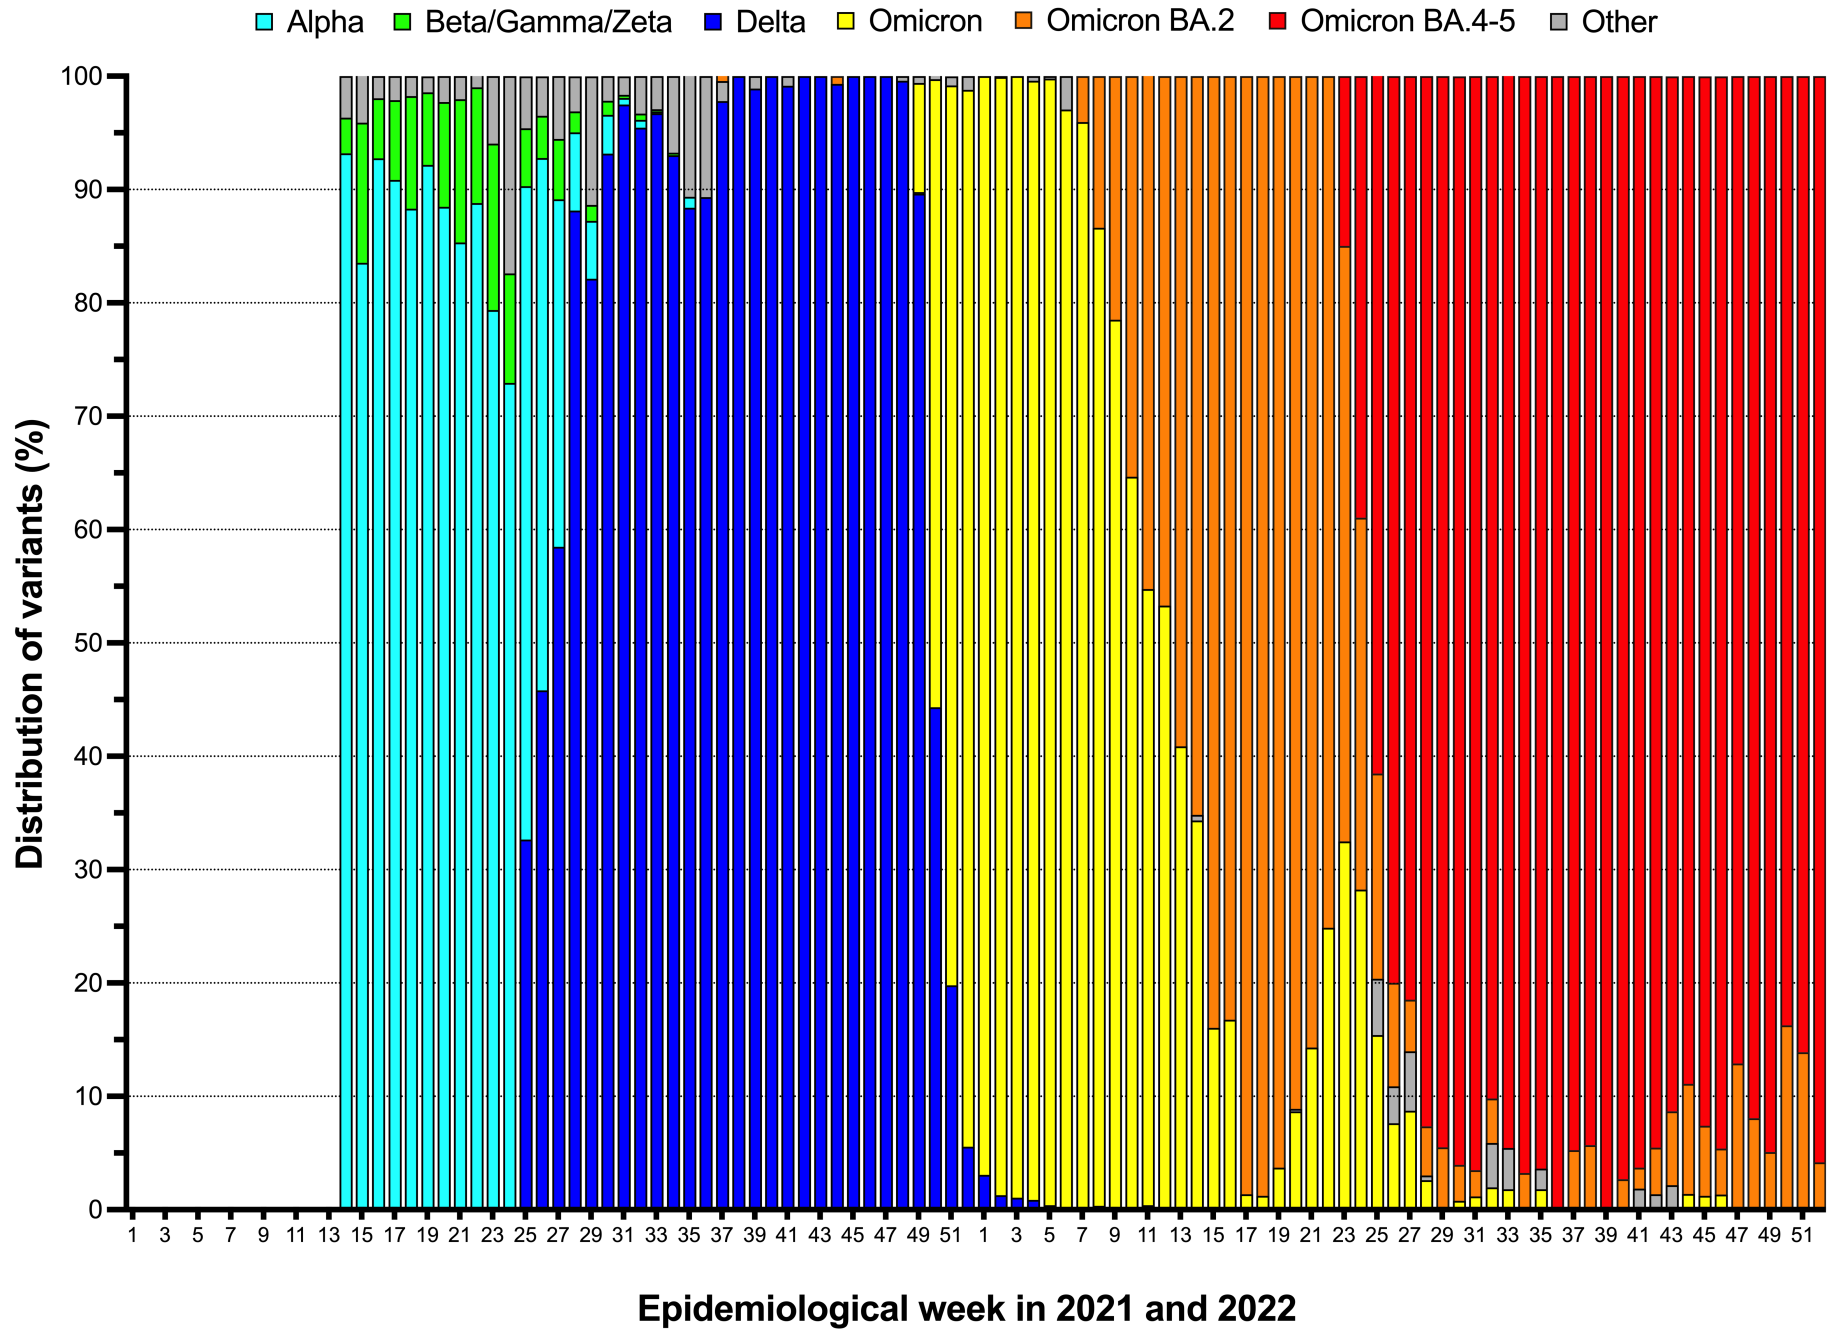

Figure S3. Residents in the Madrid region on December 31, 2019 stratified by age and sex.

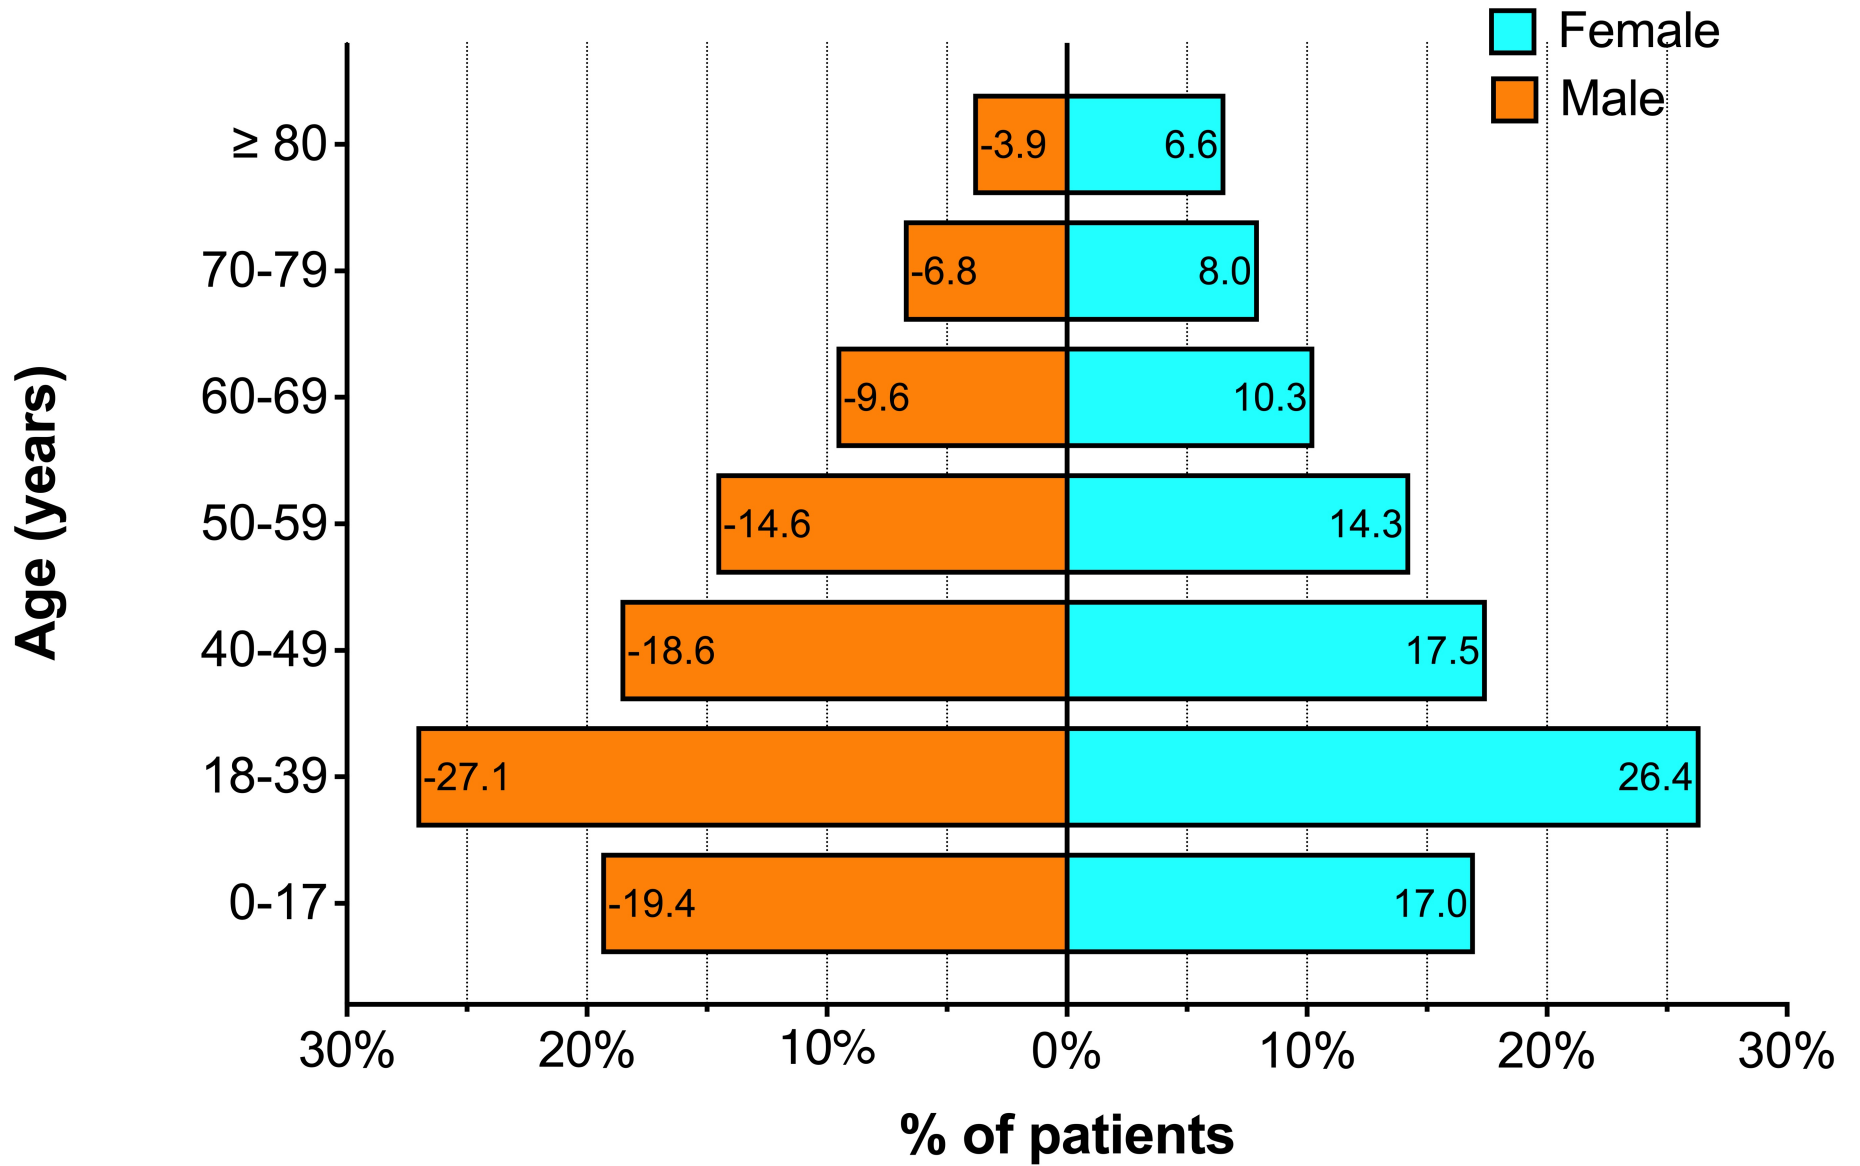



Figure S4. Types of COVID-19 hospitalizations by semesters across the study period, Madrid region, 2020-2022

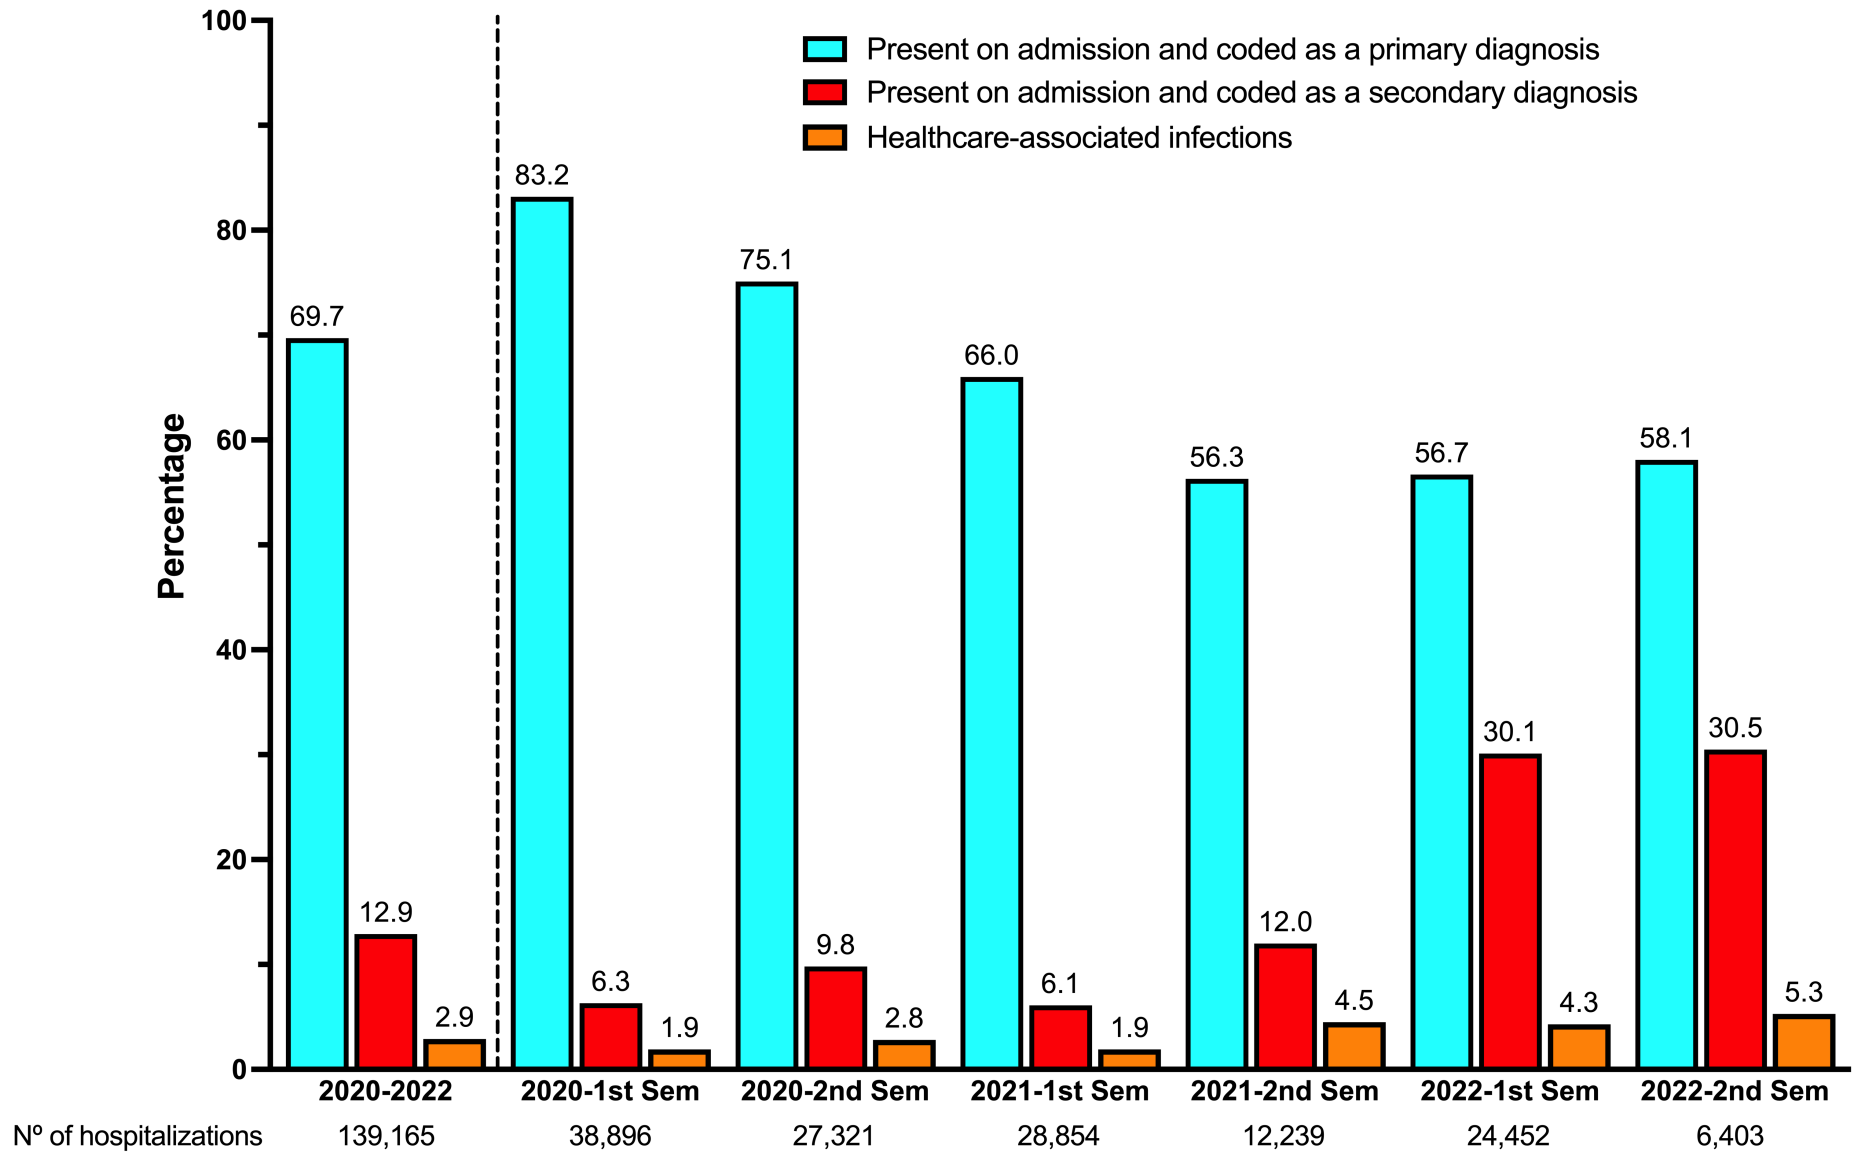

In 14.5% hospitalizations, COVID-19 was not present on admission though criteria for probable or definite hospital-acquired infections were not met.

Figure S5. Cumulative uptake of at least one dose of COVID-19 vaccine overall and by age group, Madrid region, 2021-2022

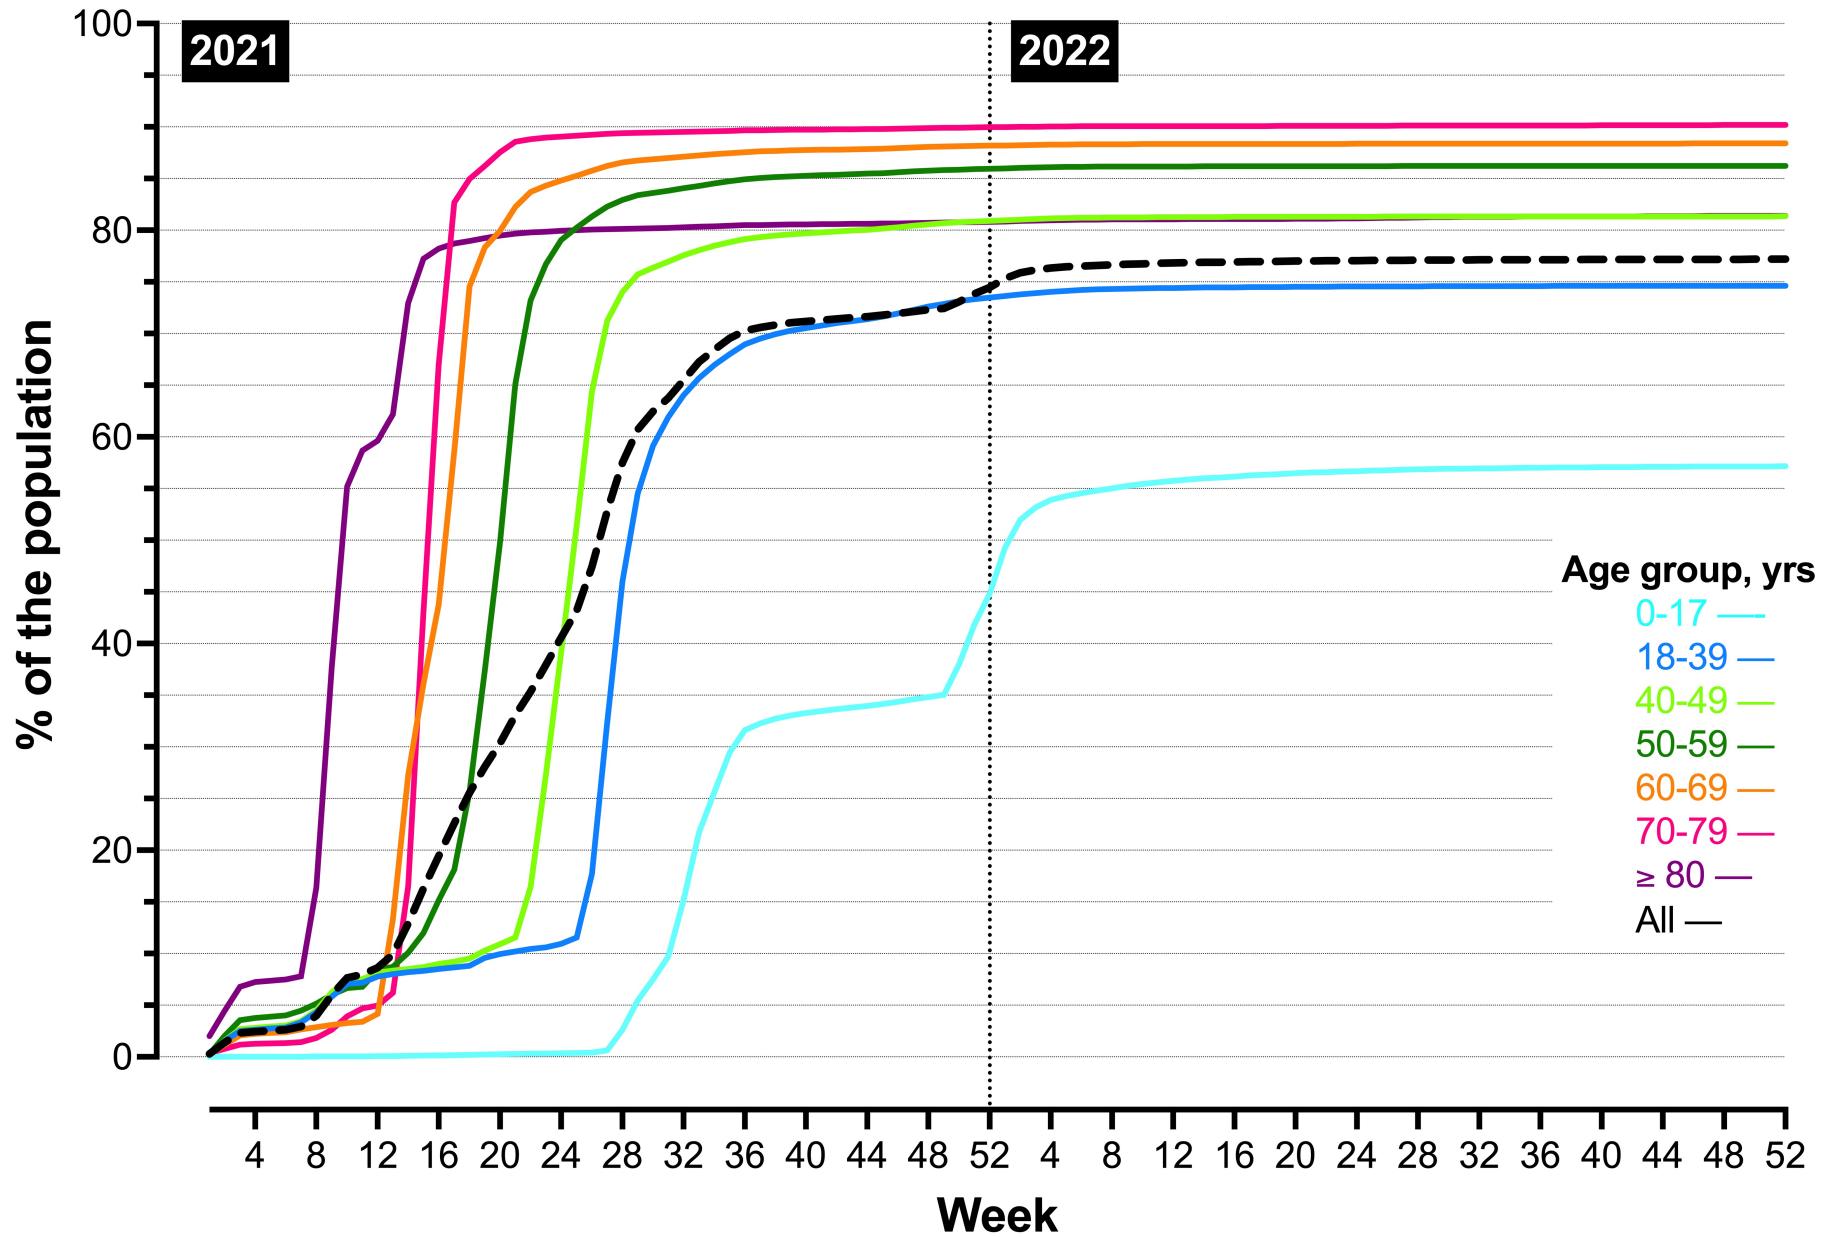

**Figure S6.** Number of COVID-19 ambulatory infections treated with nirmatrelvir plus Ritonavir and molnupiravir in the Madrid region from April to December 2022

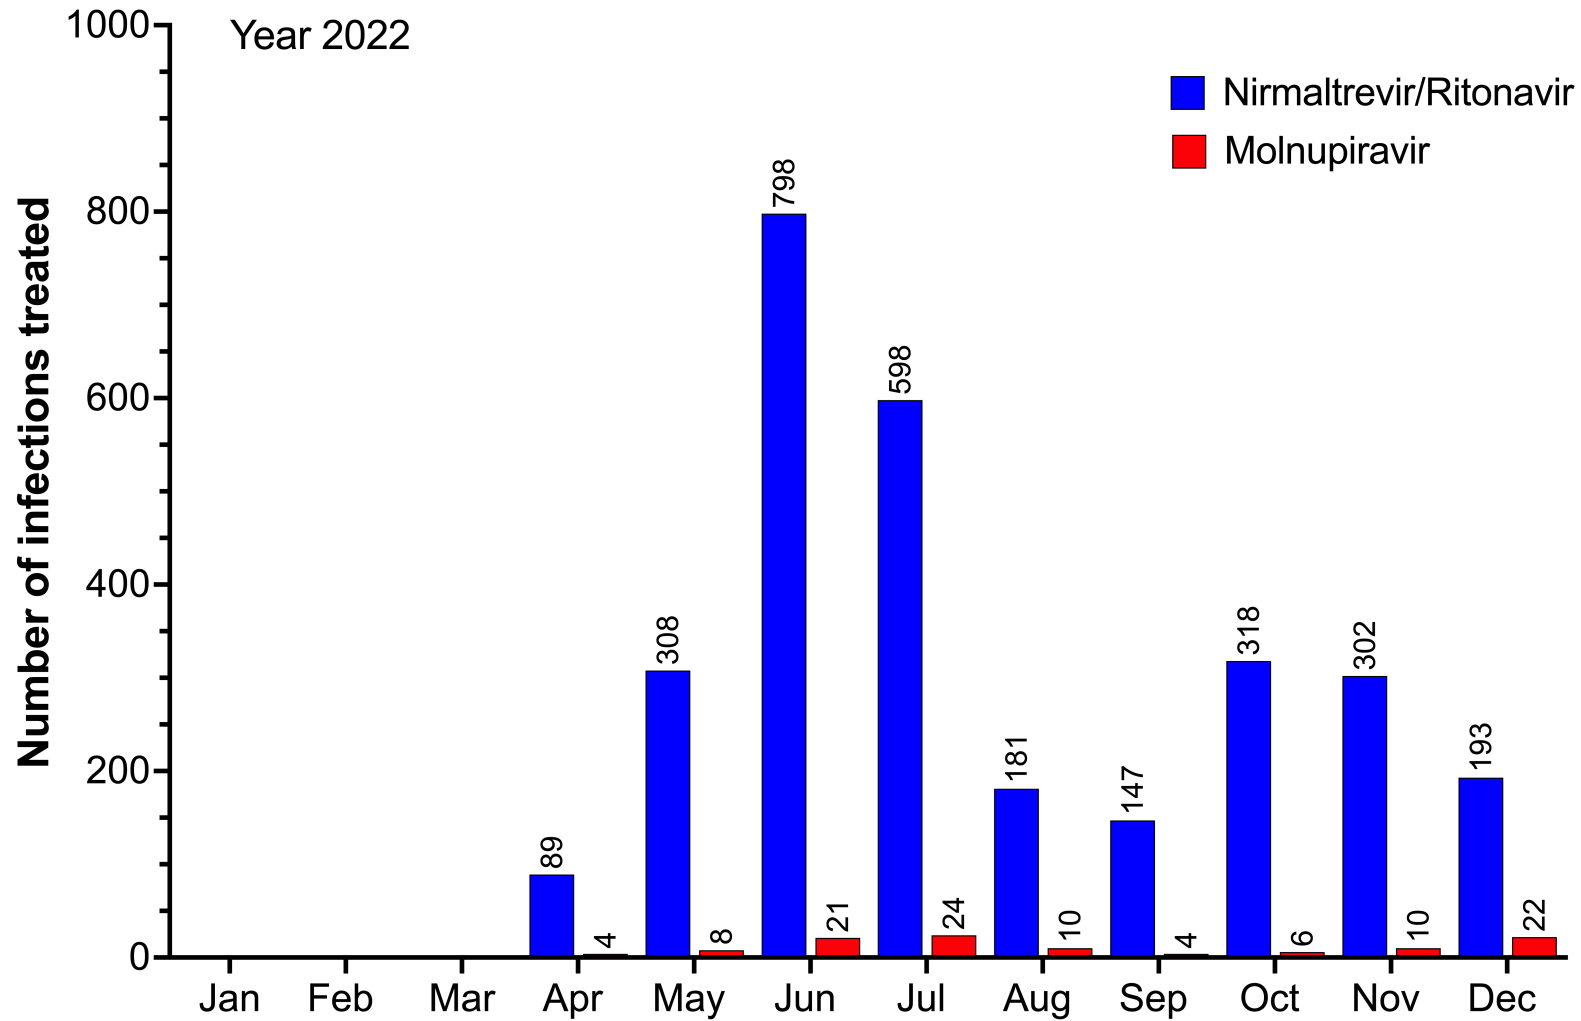

| Documented Infections | Jan     | Feb    | Mar    | Apr    | May    | Jun    | Jul    | Aug   | Sep   | Oct    | Nov    | Dec   |
|-----------------------|---------|--------|--------|--------|--------|--------|--------|-------|-------|--------|--------|-------|
|                       | 237,313 | 43,286 | 21,498 | 21,793 | 56,412 | 70,969 | 36,390 | 8,801 | 6,115 | 13,388 | 10,567 | 6,604 |

These antivirals were authorized for use within the first five days of symptoms among ambulatory individuals with confirmed COVID-19 and severe immunosuppression or those aged 65 or more with severe comorbidities

**Annex 1. International Classification of Primary Care (ICPC-2) Codes of comorbidities registered for this study.**

| Comorbidity                                               | ICPC-2 Codes                                                                          |
|-----------------------------------------------------------|---------------------------------------------------------------------------------------|
| Obesity                                                   | T82                                                                                   |
| Diabetes mellitus                                         | T89, T90                                                                              |
| Hypertension                                              | K86, K87                                                                              |
| Cardiovascular disease *                                  | K74-K78                                                                               |
| Cerebrovascular disease †                                 | K89-K91                                                                               |
| Asthma                                                    | R96                                                                                   |
| Chronic obstructive pulmonary disease                     | R95                                                                                   |
| Chronic renal failure                                     | U99.01                                                                                |
| Connective tissue disease ‡                               | L88, L88.01, L99                                                                      |
| Liver cirrhosis                                           | D97                                                                                   |
| Solid neoplasms (diagnosed in the previous 5 years)       | A79, D74-D77, L71, N74, N76, R84, R85, S77, T71, T73, U75-U77, X75-X77, Y77, Y78, W72 |
| Hematologic neoplasms (diagnosed in the previous 5 years) | B72-B74                                                                               |
| HIV infection                                             | B90                                                                                   |
| Organ transplantation,                                    | A89 (special coding)                                                                  |
| Depressive disorder                                       | P76                                                                                   |
| Psychosis #                                               | P72, P73, P98                                                                         |
| Dementia                                                  | P70                                                                                   |

\* Ischemic heart disease, Heart failure, Atrial fibrillation

† Stroke, Transient ischemic attack

‡ Rheumatoid arthritis, Ankylosing spondylitis, Systemic lupus erythematosus, and other connective tissue disorders

# Affective psychosis, Schizophrenia, other organic psychoses

## Annex 2. ICD-10-CM Codes

|                                  |                                                                                                                                                                                                                                                              |
|----------------------------------|--------------------------------------------------------------------------------------------------------------------------------------------------------------------------------------------------------------------------------------------------------------|
| <b>COVID-19 hospitalization*</b> | Defined by any of the following codes in CMBD [1].<br><br>1) An ICD-10-CM code B97.29 "other coronavirus as the cause of diseases classified elsewhere" in CMBD before July 1, 2020<br><br>2) An ICD-10-CM code U07.1 for COVID-19 in CMBD from July 1, 2020 |
| <b>ICU admission</b>             | Defined by a CMBD code for any critical care unit admission during the hospitalization.                                                                                                                                                                      |
| <b>Mechanical ventilation</b>    | Defined by any of the following ICD-10-CM procedure codes: 5A1935Z, 5A1945Z, 5A1955Z in CMBD.                                                                                                                                                                |

**Abbreviations:** ICD-10-CM, International Classification of Diseases, 10th edition, Clinical Modification; CMBD, Spanish Minimum Basic Data Set (Conjunto Mínimo Básico de Datos); ICU, intensive care unit.

1. World Health Organization. Emergency use ICD codes for COVID-19 disease outbreak. Available at: <https://www.who.int/standards/classifications/classification-of-diseases/emergency-use-icd-codes-for-covid-19-disease-outbreak>.

\*Specialists in clinical documentation further characterized COVID-19 hospitalization as whether the infection was present on admission and whether it was the primary or a secondary diagnosis.

- **Primary diagnosis** corresponded to acute or persistently symptomatic infections with potentially life-threatening manifestations (e.g., COVID-19 pneumonia).
- COVID-19 hospitalizations coded as a **secondary diagnosis** include hospitalizations for underlying diseases that are exacerbated or caused by contracting COVID-19 (e.g., heart failure), hospitalizations for unrelated incidental conditions which also happen to have a COVID-19 infection (e.g., bone fracture), and even hospitalizations for disorders for which COVID-19 is believed to be responsible. However, the patient has no active acute illness (e.g., lung embolism).

### Annex 3. International Classification of Disease, 10th Revision (ICD-10) Coding Algorithms for Charlson Comorbidities

| Comorbidity                           | ICD-10 Codes                                                                                                                                                                  |
|---------------------------------------|-------------------------------------------------------------------------------------------------------------------------------------------------------------------------------|
| Myocardial infarction                 | I21.x, I22.x, I25.2                                                                                                                                                           |
| Congestive heart failure              | I09.9, I11.0, I13.0, I13.2, I25.5, I42.0, I42.5-I42.9, I43.x, I50.x, P29.0                                                                                                    |
| Peripheral vascular disease           | I70.x, I71.x, I73.1, I73.8, I73.9, I77.1, I79.0, I79.2, K55.1, K55.8, K55.9, Z95.8, Z95.9                                                                                     |
| Cerebrovascular disease               | G45.x, G46.x, H34.0, I60.x-I69.x                                                                                                                                              |
| Dementia                              | F00.x-F03.x, F05.1, G30.x, G31.1                                                                                                                                              |
| Chronic pulmonary disease             | I27.8, I27.9, J40.x-J47.x, J60.x-J67.x, J68.4, J70.1, J70.3                                                                                                                   |
| Rheumatic disease                     | M05.x, M06.x, M31.5, M32.x-M34.x, M35.1, M35.3, M36.0                                                                                                                         |
| Peptic ulcer                          | K25.x-K28.x                                                                                                                                                                   |
| Diabetes without chronic complication | E10.0, E10.1, E10.6, E10.8, E10.9, E11.0, E11.1, E11.6, E11.8, E11.9, E12.0, E12.1, E12.6, E12.8, E12.9, E13.0, E13.1, E13.6, E13.8, E13.9, E14.0, E14.1, E14.6, E14.8, E14.9 |
| Diabetes with chronic complication    | E10.2-E10.5, E10.7, E11.2-E11.5, E11.7, E12.2-E12.5, E12.7, E13.2-E13.5, E13.7, E14.2-E14.5, E14.7                                                                            |
| Hemiplegia or paraplegia              | G04.1, G11.4, G80.1, G80.2, G81.x, G82.x, G83.0-G83.4, G83.9                                                                                                                  |
| Renal disease                         | I12.0, I13.1, N03.2-N03.7, N05.2-N05.7, N18.x, N19.x, N25.0, Z49.0-Z49.2, Z94.0, Z99.2                                                                                        |
| Liver disease, mild                   | B18.x, K70.0-K70.3, K70.9, K71.3-K71.5, K71.7, K73.x, K74.x, K76.0, K76.2-K76.4, K76.8, K76.9, Z94.4                                                                          |
| Liver disease, moderate or severe     | I85.0, I85.9, I86.4, I98.2, K70.4, K71.1, K72.1, K72.9, K76.5, K76.6, K76.7                                                                                                   |
| Any malignancy*                       | C00.x-C26.x, C30.x-C34.x, C37.x-C41.x, C43.x, C45.x-C58.x, C60.x-C76.x, C81.x-C85.x, C88.x, C90.x-C97.x                                                                       |
| Metastatic solid tumor                | C77.x-C80.x                                                                                                                                                                   |
| HIV/AIDS                              | B20.x-B22.x, B24.x                                                                                                                                                            |

\*Including lymphoma and leukemia, except malignant neoplasm of skin

**Reference:** Quan H, Sundararajan V, Halfon P, et al. Coding algorithms for defining comorbidities in ICD-9-CM and ICD-10 administrative data. *Med Care.* 2005;43(11):1130-1139.
